# Supplementary material for: The Tip of the Iceberg: Genotype of Puerto Rican Pediatric Obesity
Source: MDPI journal article supplement (doi:10.3390/genes15040394), 2024-03-22
Supplement: s1 [file s1]

| <i>Gene</i>      | <i>Gene Name</i>                                                  | <i>NCBI Accession Number</i> |
|------------------|-------------------------------------------------------------------|------------------------------|
| <i>ADCY3</i>     | Adenylate Cyclase 3                                               | NC_000001.11                 |
| <i>AFF4</i>      | AF4/FMR2 Family Member 4                                          | NC_000005.10                 |
| <i>ALMS1</i>     | Alström Syndrome 1                                                | NC_000002.12                 |
| <i>ARL6</i>      | ADP Ribosylation Factor Like GTPase 6                             | NC_000003.12                 |
| <i>BBIP1</i>     | BBSome Interacting Protein 1                                      | NC_000012.12                 |
| <i>BBS1</i>      | Bardet-Biedl Syndrome 1                                           | NC_000011.10                 |
| <i>BBS10</i>     | Bardet-Biedl Syndrome 10                                          | NC_000012.12                 |
| <i>BBS12</i>     | Bardet-Biedl Syndrome 12                                          | NC_000004.12                 |
| <i>BBS2</i>      | Bardet-Biedl Syndrome 2                                           | NC_000016.10                 |
| <i>BBS4</i>      | Bardet-Biedl Syndrome 4                                           | NC_000015.10                 |
| <i>BBS5</i>      | Bardet-Biedl Syndrome 5                                           | NC_000002.12                 |
| <i>BBS7</i>      | Bardet-Biedl Syndrome 7                                           | NC_000004.12                 |
| <i>BBS9</i>      | Bardet-Biedl Syndrome 9                                           | NC_000007.14                 |
| <i>BDNF</i>      | Brain-Derived Neurotrophic Factor                                 | NC_000011.10                 |
| <i>CEP290</i>    | Centrosomal Protein 290                                           | NC_000012.12                 |
| <i>CFAP418</i>   | Cilia And Flagella Associated Protein 418                         | NC_000004.12                 |
| <i>CPE</i>       | Carboxypeptidase E                                                | NC_000004.12                 |
| <i>CREBBP</i>    | CREB Binding Protein                                              | NC_000016.10                 |
| <i>CUL4B</i>     | Cullin 4B                                                         | NC_000023.11                 |
| <i>DNMT3A</i>    | DNA Methyltransferase 3 Alpha                                     | NC_000002.12                 |
| <i>DYRK1B</i>    | Dual-Specificity Tyrosine-(Y)-Phosphorylation Regulated Kinase 1B | NC_000019.10                 |
| <i>EP300</i>     | E1A Binding Protein P300                                          | NC_000022.11                 |
| <i>GNAS</i>      | GNAS Complex Locus                                                | NC_000020.11                 |
| <i>HTR2C</i>     | 5-Hydroxytryptamine Receptor 2C                                   | NC_000023.11                 |
| <i>IFT172</i>    | Intraflagellar Transport 172                                      | NC_000008.11                 |
| <i>IFT27</i>     | Intraflagellar Transport 27                                       | NC_000001.11                 |
| <i>IFT74</i>     | Intraflagellar Transport 74                                       | NC_000022.11                 |
| <i>INPP5E</i>    | Inositol Polyphosphate-5-Phosphatase E                            | NC_000009.12                 |
| <i>ISL1</i>      | ISL LIM Homeobox 1                                                | NC_000005.10                 |
| <i>KIDINS220</i> | Kinase D Interacting Substrate 220                                | NC_000018.10                 |
| <i>KSR2</i>      | Kinase Suppressors of Ras 2                                       | NC_000012.12                 |
| <i>LEP</i>       | Leptin                                                            | NC_000016.10                 |
| <i>LEPR</i>      | Leptin Receptor                                                   | NC_000001.11                 |
| <i>LZTFL1</i>    | Leucine Zipper Transcription Factor Like 1                        | NC_000003.12                 |
| <i>MAGEL2</i>    | MAGE Family Member L2                                             | NC_000015.10                 |
| <i>MC3R</i>      | Melanocortin 3 Receptor                                           | NC_000020.11                 |
| <i>MC4R</i>      | Melanocortin 4 Receptor                                           | NC_000018.10                 |
| <i>MECP2</i>     | Methyl-CpG Binding Protein 2                                      | NC_000023.11                 |
| <i>MKKS</i>      | McKusick-Kaufman Syndrome                                         | NC_000020.11                 |
| <i>MKS1</i>      | Meckel Syndrome 1                                                 | NC_000017.11                 |
| <i>MRAP2</i>     | Melanocortin 2 Receptor Accessory Protein 2                       | NC_000019.10                 |
| <i>NCOA1</i>     | Nuclear Receptor Coactivator 1                                    | NC_000002.12                 |
| <i>NR0B2</i>     | Nuclear Receptor Subfamily 0 Group B Member 2                     | NC_000001.11                 |
| <i>NRP1</i>      | Neuropilin 1                                                      | NC_000010.11                 |
| <i>NRP2</i>      | Neuropilin 2                                                      | NC_000002.12                 |
| <i>NTRK2</i>     | Neurotrophic Tyrosine Kinase Receptor Type 2                      | NC_000009.12                 |
| <i>PCNT</i>      | Pericentrin                                                       | NC_000021.9                  |
| <i>PCSK1</i>     | Proprotein Convertase Subtilisin/Kexin Type 1                     | NC_000005.10                 |
| <i>PHF6</i>      | PHD Finger Protein 6                                              | NC_000007.14                 |
| <i>PHIP</i>      | Pleckstrin Homology Domain Interacting Protein                    | NC_000006.12                 |
| <i>PLXNA1</i>    | Plexin A1                                                         | NC_000003.12                 |
| <i>PLXNA2</i>    | Plexin A2                                                         | NC_000001.11                 |
| <i>PLXNA3</i>    | Plexin A3                                                         | NC_000003.12                 |
| <i>PLXNA4</i>    | Plexin A4                                                         | NC_000012.12                 |
| <i>POMC</i>      | Proopiomelanocortin                                               | NC_000002.12                 |
| <i>PPARG</i>     | Peroxisome Proliferator Activated Receptor Gamma                  | NC_000003.12                 |
| <i>PROK2</i>     | Prokineticin 2                                                    | NC_000003.12                 |
| <i>RAB23</i>     | RAB23, Member RAS Oncogene Family                                 | NC_000006.12                 |

|                 |                                              |              |
|-----------------|----------------------------------------------|--------------|
| <i>RAI1</i>     | Retinoic Acid Induced 1                      | NC_000017.11 |
| <i>RPGRIP1L</i> | RPGRIP1 Like                                 | NC_000014.9  |
| <i>RPS6KA3</i>  | Ribosomal Protein S6 Kinase A3               | NC_000006.12 |
| <i>SDCCAG8</i>  | Serologically Defined Colon Cancer Antigen 8 | NC_000002.12 |
| <i>SEMA3A</i>   | Semaphorin 3A                                | NC_000005.10 |
| <i>SEMA3F</i>   | Semaphorin 3F                                | NC_000003.12 |
| <i>SEMA3G</i>   | Semaphorin 3G                                | NC_000003.12 |
| <i>SH2B1</i>    | SH2B Adaptor Protein 1                       | NC_000016.10 |
| <i>SIM1</i>     | SIM BHLH Transcription Factor 1              | NC_000006.12 |
| <i>TUB</i>      | Tubby Bipartite Transcription Factor         | NC_000007.14 |
| <i>UCP3</i>     | Uncoupling Protein 3                         | NC_000011.10 |
| <i>VPS13B</i>   | Vacuolar Protein Sorting 13 Homolog B        | NC_000008.11 |

**Table S2:** Genes analyzed by Rhythm Pharmaceuticals Laboratories (PreventionGenetics, Marshfield, WI, USA).
