# Supplementary material for: The Tip of the Iceberg: Genotype of Puerto Rican Pediatric Obesity
Source: MDPI journal article supplement (doi:10.3390/genes15040394), 2024-03-22
Supplement: s1 [file s1]

| IDN | Age | Gene   | DNA Variant    | Predicted protein change | Mode of Inheritance | Zygosity     | ClinVar ID | Highest Allele Frequency in a gnomAD population (%) | In Silico Missense Predictions | Interpretation | Disease associated                                                                                                                                         |
|-----|-----|--------|----------------|--------------------------|---------------------|--------------|------------|-----------------------------------------------------|--------------------------------|----------------|------------------------------------------------------------------------------------------------------------------------------------------------------------|
| 1   | 9   | ALMS1  | c.3907_3909del | p.Ser1303del             | AR                  | Heterozygous | 550818     | 0.0035                                              | Not applicable                 | VUS            | Alstrom syndrome                                                                                                                                           |
| 1   | 9   | MKS1   | c.322C>T       | p.Arg108Cys              | AR                  | Heterozygous | 853823     | 0.059                                               | Conflicting                    | VUS            | Bardet-Biedl syndrome 13 OMIM #615990, autosomal recessive Joubert syndrome 28 OMIM #617121, and autosomal recessive Meckel-Gruber syndrome 1 OMIM #249000 |
| 2   | 11  | ALMS1  | c.12001C>T     | p.Arg4001Trp             | AR                  | Heterozygous | 391899     | 0.05                                                | Conflicting                    | VUS            | Alstrom syndrome                                                                                                                                           |
| 2   | 11  | ALMS1  | c.5459C>T      | p.Pro1820Leu             | AR                  | Heterozygous | 241003     | 0.091                                               | Conflicting                    | VUS            | Alstrom syndrome                                                                                                                                           |
| 2   | 11  | BBS9   | c.2365A>G      | p.Lys789Glu              | AR                  | Heterozygous | 971120     | 0.00088                                             | Conflicting                    | VUS            | Bardet-Biedl syndrome 9                                                                                                                                    |
| 3   | 9   | MKS1   | c.199C>T       | p.Arg67Cys               | AR                  | Heterozygous | 461763     | 0.087                                               | Not available                  | VUS            | Bardet-Biedl syndrome 13                                                                                                                                   |
| 3   | 9   | TUB    | c.161C>A       | p.Thr54Lys               | AR                  | Heterozygous | 1006177    | 0.087                                               | Not available                  | VUS            | retinal dystrophy and obesity                                                                                                                              |
| 5   | 7   | BBS1   | c.1169T>G      | p.Met390Arg              | AR                  | Heterozygous | 12143      | 0.28                                                | Not available                  | Pathogenic     | Bardet-Biedl syndrome 1                                                                                                                                    |
| 5   | 7   | BBS12  | c.152G>C       | p.Ser51Thr               | AR                  | Heterozygous | 968505     | 0.0087                                              | Not available                  | VUS            | Bardet-Biedl syndrome 12                                                                                                                                   |
| 5   | 7   | RAI1   | c.2422G>A      | p.Gly808Arg              | AR                  | Heterozygous | 196538     | 0.026                                               | Not available                  | VUS            | Smith-Magenis syndrome                                                                                                                                     |
| 7   | 10  | LEPR   | c.296G>A       | p.Cys99Tyr               | Not Listed          | Not listed   | .          | 0.038                                               | Conflicting                    | VUS            | obesity and hypogonadotropic hypogonadism                                                                                                                  |
| 7   | 10  | POMC   | c.706C>G       | p.Arg236Gly              | AR, AD              | Heterozygous | 13356      | 0.78                                                | Damaging                       | VUS            | severe obesity                                                                                                                                             |
| 8   | 15  | BBS1   | c.1645G>T      | p.Glu549*                | AR                  | Heterozygous | 12144      | 0.0087                                              | Not available                  | Pathogenic     | Bardet-Biedl syndrome 1                                                                                                                                    |
| 9   | 6   | MKS1   | c.857A>G       | p.Asp286Gly              | AR                  | Heterozygous | 609883     | 0.099                                               | Conflicting                    | VUS            | Bardet-Biedl syndrome 13                                                                                                                                   |
| 9   | 6   | MKS1   | c.83T>C        | p.Val28Ala               | AR                  | Heterozygous | 609883     | 0.007                                               | Conflicting                    | VUS            | Bardet-Biedl syndrome 13                                                                                                                                   |
| 10  | 18  | PCNT   | c.9800G>A      | p.Arg3267His             | AR                  | Heterozygous | Not listed | 0.02                                                | Tolerated                      | VUS            | microcephalic osteodysplastic primordial dwarfism, type II                                                                                                 |
| 10  | 18  | SEMA3F | c.1963C>A      | p.Arg655Ser              | Unknown             | Heterozygous | Not listed | 0.058                                               | Conflicting                    | VUS            | obesity                                                                                                                                                    |
| 11  | 16  | PLXNA2 | c.614G>A       | p.Arg205Gln              | Unknown             | Heterozygous | Not listed | 0.068                                               | Conflicting                    | VUS            | autism spectrum disorder                                                                                                                                   |
| 11  | 16  | SH2B1  | c.1028C>T      | p.Thr343Met              | AR                  | Heterozygous | Not listed | 0.048                                               | Conflicting                    | VUS            | obesity, insulin resistance and maladaptive behavior phenotypes                                                                                            |
| 11  | 16  | TUB    | c.901G>A       | p.Val301Ile              | AR                  | Heterozygous | 956470     | 0.015                                               | Conflicting                    | VUS            | recessive retinal dystrophy and obesity                                                                                                                    |
| 12  | 9   | MAGEL2 | c.1266_1286dup | p.Ile423_Pro429dup       | AR                  | Heterozygous | Not listed | 0.014                                               | .                              | VUS            | Schaaf-Yang syndrome                                                                                                                                       |
| 12  | 9   | PCSK1  | c.661A>G       | p.Asn221Asp              | AR                  | Heterozygous | 14040      | 6.6                                                 | Conflicting                    | RISK           | obesity with impaired prohormone processing                                                                                                                |
| 14  | 7   | SH2B1  | c.1028C>T      | p.Thr343Met              | AR                  | Heterozygous | Not listed | 0.048                                               | Conflicting                    | VUS            | obesity, insulin resistance and maladaptive behavior phenotypes                                                                                            |
| 16  | 5   | PCSK1  | c.661A>G       | p.Asn221Asp              | AR                  | Heterozygous | 14040      | 6.6                                                 | Confliction                    | RISK           | obesity with impaired prohormone processing                                                                                                                |
| 17  | 18  | BBS9   | c.396G>C       | p.Gln132His              | AR                  | Heterozygous | 841915     | 0.042                                               | Damaging                       | VUS            | Bardet-Biedl syndrome 9                                                                                                                                    |
| 17  | 18  | LEPR   | c.658G>A       | p.Val220Ile              | AR                  | Heterozygous | 917428     | 0.13                                                | Tolerated                      | VUS            | obesity and hypogonadotropic hypogonadism due to leptin receptor deficiency                                                                                |
| 18  | 4   | PCNT   | c.9800G>A      | p.Arg3267His             | AR                  | Heterozygous | Not listed | 0.02                                                | Tolerated                      | VUS            | autosomal recessive microcephalic osteodysplastic primordial dwarfism, type II                                                                             |
| 18  | 4   | PCSK1  | c.1918A>G      | p.Thr640Ala              | AR                  | Heterozygous | 436278     | 0.45                                                | Tolerated                      | VUS            | obesity with impaired prohormone processing                                                                                                                |
| 21  | 11  | ADCY3  | c.1222G>A      | p.Gly408Arg              | AR                  | Heterozygous | Not listed | 0.029                                               | Conflicting                    | VUS            | autosomal recessive severe obesity                                                                                                                         |
| 21  | 11  | PLXNA1 | c.224C>T       | p.Ser75Leu               | Unknown             | Heterozygous | Not listed | 0.0062                                              | Conflicting                    | VUS            | Semaphorin 3 signaling and may be associated with obesity                                                                                                  |
| 21  | 11  | SEMA3F | c.229G>A       | p.Val77Met               | Unknown             | Heterozygous | Not listed | 0.09                                                | Conflicting                    | VUS            | obesity                                                                                                                                                    |
| 22  | 13  | LEPR   | c.430G>T       | p.Val144Leu              | AR                  | Heterozygous | 393362     | 0.024                                               | Tolerated                      | VUS            | obesity and hypogonadotropic hypogonadism due to leptin receptor deficiency                                                                                |
| 24  | 14  | VPS13B | c.4254T>G      | p.His1418Gln             | AR                  | Heterozygous | 626047     | 0.0058                                              | Conflicting                    | VUS            | .                                                                                                                                                          |
| 26  | 15  | VPS13B | c.559C>T       | p.Arg187Cys              | AR                  | Heterozygous | 570075     | 0.0035                                              | Damaging                       | VUS            | .                                                                                                                                                          |
| 27  | 8   | PLXNA1 | c.1825G>A      | p.Val609Ile              | Unknown             | Heterozygous | Not listed | 0.02                                                | Tolerated                      | VUS            | developmental delay and autism spectrum disorder                                                                                                           |
| 27  | 8   | PLXNA1 | c.2618C>T      | p.Thr873Met              | Unknown             | Heterozygous | Not listed | 0.0085                                              | Conflicting                    | VUS            | developmental delay and autism spectrum disorder                                                                                                           |
| 27  | 8   | RAI1   | c.5435C>T      | p.Pro1812Leu             | AR                  | Heterozygous | 1204491    | 0.039                                               | Conflicting                    | VUS            | Smith-Magenis syndrome                                                                                                                                     |
| 29  | 2   | IFT172 | c.886C>T       | p.Arg296Trp              | AR                  | Heterozygous | 97028      | 0.11                                                | Damaging                       | VUS            | Mainzer-Saldino syndrome                                                                                                                                   |

|    |    |                 |            |                   |         |              |            |         |                |                   |                                                                                                                                                                                                                                    |
|----|----|-----------------|------------|-------------------|---------|--------------|------------|---------|----------------|-------------------|------------------------------------------------------------------------------------------------------------------------------------------------------------------------------------------------------------------------------------|
| 29 | 2  | <i>NRP2</i>     | c.2681A>C  | p.Glu894Ala       | AR      | Heterozygous | Not listed | .       | Damaging       | VUS               | Semaphorin 3 signaling and may be associated with obesity severe obesity                                                                                                                                                           |
| 29 | 2  | <i>UCP3</i>     | c.58G>A    | p.Ala20Thr        | AR      | Heterozygous | Not listed | 0.029   | Damaging       | VUS               |                                                                                                                                                                                                                                    |
| 38 | 17 | <i>VPS13B</i>   | c.5528A>T  | p.Glu1843Val      | AR      | Heterozygous | 966951     | 0.032   | Conflicting    | VUS               |                                                                                                                                                                                                                                    |
| 38 | 17 | <i>KIDINS20</i> | c.136G>A   | p.Ala46Thr        | AR, AD  | Heterozygous | 1365824    | 0.12    | Conflicting    | VUS               | de novo in patients with spastic paraplegia, intellectual disability, nystagmus, and obesity                                                                                                                                       |
| 44 | 6  | <i>PCNT</i>     | c.9752dup  | p.Thr3252Asnfs*84 | AR      | Heterozygous | Not listed | 0.012   | Not applicable | Likely Pathogenic | autosomal recessive microcephalic osteodysplastic primordial dwarfism, type II                                                                                                                                                     |
| 44 | 6  | <i>PLXNA3</i>   | c.1709C>T  | p.Ala570Val       | Unknown | Heterozygous | Not listed | 0.027   | Tolerated      | VUS               | obesity, mild intellectual disability, and autism spectrum disorder                                                                                                                                                                |
| 49 | 11 | <i>BBS9</i>     | c.2593A>G  | p.Thr865Ala       | AR      | Heterozygous | 360072     | 0.051   | Tolerated      | VUS               | Bardet-Biedl syndrome 9                                                                                                                                                                                                            |
| 49 | 11 | <i>EP300</i>    | c.1991T>C  | p.Met664Thr       | AR      | Heterozygous | 1201502    | 0.0096  | Conflicting    | VUS               | Autosomal Dominant Rubinstein-Taybi syndrome 2, and Menke-Hennekam syndrome 2                                                                                                                                                      |
| 49 | 11 | <i>KIDINS20</i> | c.3548C>G  | p.Ala1183Gly      | AR, AD  | Heterozygous | Not listed | 0.017   | Conflicting    | VUS               | de novo in patients with spastic paraplegia, intellectual disability, nystagmus, and obesity                                                                                                                                       |
| 50 | 8  | <i>NRP2</i>     | c.1490C>T  | p.Thr497Ile       | Unknown | Heterozygous | Not listed | 0.00088 | Conflicting    | VUS               | Semaphorin 3 signaling and may be associated with obesity                                                                                                                                                                          |
| 50 | 8  | <i>VPS13B</i>   | c.4254T>G  | p.His1418Gln      | AR      | Heterozygous | 626047     | 0.0058  | Conflicting    | VUS               | Cohen syndrome                                                                                                                                                                                                                     |
| 53 | 13 | <i>EP300</i>    | c.2645C>G  | p.Pro882Arg       | AR      | Heterozygous | 1691054    | 0.018   | Conflicting    | VUS               | Autosomal Dominant Rubinstein-Taybi syndrome 2, and Menke-Hennekam syndrome 2                                                                                                                                                      |
| 53 | 13 | <i>RAI1</i>     | c.2422G>A  | p.Gly808Arg       | AR      | Heterozygous | 196538     | 0.026   | Tolerated      | VUS               | Autosomal dominant Smith-Magenis syndrome                                                                                                                                                                                          |
| 56 | 11 | <i>CEP290</i>   | c.6572A>T  | p.His2191Leu      | AR      | Heterozygous | 959829     | 0.023   | Tolerated      | VUS               | autosomal recessive conditions Leber congenital amaurosis 10 OMIM #611755, Bardet-Biedl syndrome 14 OMIM #615991, Joubert syndrome 5 OMIM #610188, MeckelGruber syndrome 4 OMIM #611134, and Senior-Loken syndrome 6 OMIM #610189. |
| 56 | 11 | <i>SDCCAG8</i>  | c.833G>A   | p.Arg278His       | AR      | Heterozygous | 850817     | 0.02    | Tolerated      | VUS               | autosomal recessive Bardet-Biedl syndrome 16 (OMIM #615993), and Senior-Loken syndrome 7 (OMIM #613615).                                                                                                                           |
| 56 | 11 | <i>VPS13B</i>   | c.10939G>A | p.Ala3647Thr      | AR      | Heterozygous | 576857     | 0.004   | Conflicting    | VUS               | Cohen syndrome                                                                                                                                                                                                                     |
| 57 | 13 | <i>ADCY3</i>    | c.1222G>A  | p.Gly408Arg       | AR      | Heterozygous | Not listed | 0.029   | Conflicting    | VUS               | autosomal recessive severe obesity                                                                                                                                                                                                 |
| 57 | 13 | <i>ALMS1</i>    | c.1606C>G  | p.Leu536Val       | AR      | Heterozygous | 403950     | 0.059   | Conflicting    | VUS               | Alstrom syndrome                                                                                                                                                                                                                   |
| 58 | 5  | <i>CEP290</i>   | c.3722A>G  | p.Lys1241Arg      | AR      | Heterozygous | Not listed | .       | Conflicting    | VUS               | autosomal recessive conditions Leber congenital amaurosis 10 OMIM #611755, Bardet-Biedl syndrome 14 OMIM #615991, Joubert syndrome 5 OMIM #610188, MeckelGruber syndrome 4 OMIM #611134, and Senior-Loken syndrome 6 OMIM #610189. |
| 59 | 7  | <i>PCSK1</i>    | c.661A>G   | p.Asn221Asp       | AR      | Heterozygous | 14040      | 6.6     | Conflicting    | RISK              | obesity with impaired prohormone processing                                                                                                                                                                                        |
| 61 | 3  | <i>BBS1</i>     | c.1169T>G  | p.Met390Arg       | AR      | Heterozygous | 12143      | 0.28    | Conflicting    | Pathogenic        | Bardet-Biedl syndrome 1                                                                                                                                                                                                            |
| 61 | 3  | <i>LEPR</i>     | c.1166G>A  | p.Ser389Asn       | AR      | Heterozygous | 297992     | 0.0098  | Damaging       | VUS               | autosomal recessive obesity and hypogonadotropic hypogonadism due to leptor receptor deficiency                                                                                                                                    |
| 61 | 3  | <i>NCOA1</i>    | c.2428G>A  | p.Asp810Asn       | AR      | Heterozygous | Not listed | 0.077   | Conflicting    | VUS               | autosomal dominant severe obesity                                                                                                                                                                                                  |
| 63 | 15 | <i>CEP290</i>   | c.3722A>G  | p.Asn1258Ser      | AR      | Heterozygous | 834384     | 0.0085  | Conflicting    | VUS               | autosomal recessive conditions Leber congenital amaurosis 10 OMIM #611755, Bardet-Biedl syndrome 14 OMIM #615991, Joubert syndrome 5 OMIM #610188, MeckelGruber syndrome 4 OMIM #611134, and Senior-Loken syndrome 6 OMIM #610189. |
| 63 | 15 | <i>ALMS1</i>    | c.4046A>G  | p.His1349Arg      | AR      | Heterozygous | 837210     | 0.058   | Tolerated      | VUS               | Alstrom syndrome                                                                                                                                                                                                                   |
| 63 | 15 | <i>RAB23</i>    | c.481+4A>C | Intronic          | AR      | Heterozygous | Not listed | 0.023   | Not applicable | VUS               | Carpenter syndrome                                                                                                                                                                                                                 |
| 63 | 15 | <i>SH2B1</i>    | c.1846T>C  | p.Ser616Pro       | AR      | Heterozygous | 929780     | 0.087   | Conflicting    | VUS               | obesity, insulin resistance and maladaptive behavior phenotypes                                                                                                                                                                    |

|    |    |         |                |                    |         |              |            |             |                |                   |                                                                                                                                                                                                                       |
|----|----|---------|----------------|--------------------|---------|--------------|------------|-------------|----------------|-------------------|-----------------------------------------------------------------------------------------------------------------------------------------------------------------------------------------------------------------------|
| 64 | 6  | NCOA1   | c.4127T>C      | p.Leu1376Pro       | AR      | Heterozygous | Not listed | 0.12        | Conflicting    | VUS               | autosomal dominant severe obesity                                                                                                                                                                                     |
| 64 | 6  | PCNT    | c.3868C>T      | p.Arg1290Cys       | AR      | Heterozygous | Not listed | 0.016       | Tolerated      | VUS               | autosomal recessive microcephalic osteodysplastic primordial dwarfism, type II                                                                                                                                        |
| 64 | 6  | PCSK1   | c.375G>A       | p.Met125Ile        | AR      | Heterozygous | 906974     | 0.031       | Conflicting    | Pathogenic        | autosomal recessive obesity with impaired prohormone processing                                                                                                                                                       |
| 64 | 6  | RPGRIPL | c.251G>A       | p.Arg84Gln         | AR      | Heterozygous | 319668     | 0.062       | Conflicting    | VUS               | COACH syndrome 3 OMIM #619113, Joubert syndrome 7 OMIM #611560, and Meckel syndrome 5 OMIM #611561.                                                                                                                   |
| 65 | 9  | MKK5    | c.697A>C       | p.Ile233Leu        | AR      | Heterozygous | 532031     | 0.054       | Tolerated      | VUS               | Bardet-Biedl syndrome OMIM #605231 and McKusick-Kaufman syndrome OMIM #236700                                                                                                                                         |
| 65 | 9  | NCOA1   | c.3111C>T      | p. =               | AR      | Heterozygous | Not listed | 0.071       | Not applicable | VUS               | autosomal dominant severe obesity                                                                                                                                                                                     |
| 65 | 9  | VPS13B  | c.5528A>T      | p.Glu1843Val       | AR      | Heterozygous | 966951     | 0.032       | Conflicting    | VUS               | autosomal dominant severe obesity                                                                                                                                                                                     |
| 66 | 9  | BBS9    | c.396G>C       | p.Gln132His        | AR      | Heterozygous | 841915     | 0.042       | Damaging       | VUS               | Bardet-Biedl syndrome 9                                                                                                                                                                                               |
| 72 | 4  | BBS2    | c.1313C>G      | p.Ser438Cys        | AR      | Heterozygous | Not listed | Not present | Conflicting    | VUS               | autosomal recessive Bardet-Biedl syndrome 2 OMIM #615981 and autosomal recessive retinitis pigmentosa 74 OMIM #616562                                                                                                 |
| 73 | 8  | VPS13B  | c.5528A>T      | p.Glu1843Val       | AR      | Heterozygous | 966951     | 0.032       | Conflicting    | VUS               | Cohen syndrome                                                                                                                                                                                                        |
| 74 | 11 | SEMA3G  | c.2245_2259del | p.Gln749_Lys753del | Unknown | Heterozygous | Not listed | 0.02        | Not applicable | VUS               | severe, early onset obesity                                                                                                                                                                                           |
| 75 | 13 | SEMA3F  | c.1963C>A      | p.Arg655Ser        | Unknown | Heterozygous | Not listed | 0.058       | Conflicting    | VUS               | obesity                                                                                                                                                                                                               |
| 79 | 18 | ALMS1   | c.7285A>C      | p.Ser2429Arg       | AR      | Heterozygous | 640904     | 0.022       | Conflicting    | VUS               | Alstrom syndrome                                                                                                                                                                                                      |
| 79 | 18 | SEMA3A  | c.271A>G       | p.Ile91Val         | AR      | Heterozygous | Not listed | 0.0087      | Conflicting    | VUS               | autosomal dominant hypogonadotropic hypogonadism 16 with or without anosmia                                                                                                                                           |
| 82 | 13 | IFT172  | c.2261A>G      | p.Glu745Gly        | AR      | Heterozygous | Not listed | 0.0029      | Conflicting    | VUS               | autosomal recessive ciliopathy-related disorders including, retinitis pigmentosa 71 OMIM #616394, short-rib thoracic dysplasia 10 with or without polydactyly OMIM #615630, and Bardet-Biedl syndrome 20 OMIM #619471 |
| 84 | 15 | BBS1    | c.1169T>G      | p.Met390Arg        | AR      | Heterozygous | 12143      | 0.28        | Conflicting    | Pathogenic        | Bardet-Biedl syndrome 1                                                                                                                                                                                               |
| 84 | 15 | PCSK1   | c.1918A>G      | p.Thr640Ala        | AR      | Heterozygous | 436278     | 0.45%       | Tolerated      | VUS               | autosomal recessive obesity with impaired prohormone processing                                                                                                                                                       |
| 84 | 15 | SIM1    | c.749C>T       | p.Ala250Val        | AR      | Heterozygous | Not listed | Not present | Conflicting    | VUS               | autosomal dominant isolated obesity                                                                                                                                                                                   |
| 86 | 18 | MKK5    | c.1530G>A      | p.Trp510*          | AR      | Heterozygous | Not listed | 0.0029      | Not applicable | Likely Pathogenic | Bardet-Biedl syndrome (OMIM #605231) and McKusick-Kaufman syndrome (OMIM #236700)                                                                                                                                     |
| 86 | 18 | AFF4    | c.587G>A       | p.Arg196Lys        | AR      | Heterozygous | 1363791    | 0.026       | Conflicting    | VUS               | CHOPS syndrome (OMIM #616368)                                                                                                                                                                                         |
| 86 | 18 | TUB     | c.901G>A       | p.Val301Ile        | AR      | Heterozygous | 956470     | 0.015       | Conflicting    | VUS               | autosomal recessive retinal dystrophy and obesity (OMIM #616188)                                                                                                                                                      |
| 88 | 10 | RPGRIPL | c.251G>A       | p.Arg84Gln         | AR      | Heterozygous | 319668     | 0.062       | Conflicting    | VUS               | autosomal recessive COACH syndrome 3 (OMIM #619113), Joubert syndrome 7 (OMIM #611560), and Meckel syndrome 5 (OMIM #611561)                                                                                          |
| 88 | 10 | PCSK1   | c.661A>G       | p.Asn221Asp        | AR      | Heterozygous | 14040      | 6.6         | Conflicting    | RISK              | autosomal recessive obesity with impaired prohormone processing (OMIM #600955). Some heterozygous variants may impart a susceptibility to obesity (OMIM #612362)                                                      |
| 89 | 7  | NCOA1   | c.3416G>A      | p.Ser1139Asn       | AR      | Heterozygous | Not listed | 0.012       | Conflicting    | VUS               | autosomal dominant severe obesity                                                                                                                                                                                     |
| 90 | 5  | NRP1    | c.608G>C       | p.Gly203Ala        | Unknown | Heterozygous | Not listed | 0.00088     | Conflicting    | VUS               | Semaphorin 3 signaling and may be associated with obesity                                                                                                                                                             |
| 93 | 11 | BBS9    | c.396G>C       | p.Gln132His        | AR      | Heterozygous | 841915     | 0.042       | Damaging       | VUS               | Bardet-Biedl syndrome 9 (OMIM #615986)                                                                                                                                                                                |
| 94 | 13 | NRP1    | c.608G>C       | p.Gly203Ala        | Unknown | Heterozygous | Not listed | 0.00088     | Conflicting    | VUS               | Semaphorin 3 signaling and may be associated with obesity                                                                                                                                                             |
| 96 | 11 | BBS7    | c.442A>C       | p.Asn148His        | AR      | Heterozygous | 1030351    | Not present | Conflicting    | VUS               | Bardet-Biedl syndrome 7 (OMIM #615984)                                                                                                                                                                                |
| 96 | 11 | KSR2    | c.735G>A       | p. =               | AR      | Heterozygous | Not listed | 0.003       | Not applicable | VUS               | autosomal dominant non-syndromic obesity characterized by early-onset hyperphagia, low heart rate, reduced basal metabolic rate, and severe insulin resistance                                                        |
| 97 | 12 | RPGRIPL | c.1709A>G      | p.Lys570Arg        | AR      | Heterozygous | 530893     | 0.02        | Conflicting    | VUS               | autosomal recessive COACH syndrome 3 (OMIM #619113),                                                                                                                                                                  |

|     |    |         |           |              |         |              |            |             |                |            |                                                                                                                                                                                                                                                                                                              |
|-----|----|---------|-----------|--------------|---------|--------------|------------|-------------|----------------|------------|--------------------------------------------------------------------------------------------------------------------------------------------------------------------------------------------------------------------------------------------------------------------------------------------------------------|
| 99  | 3  | MC4R    | c.227A>G  | p.His76Arg   | AR      | Heterozygous | Not listed | 0.008       | Conflicting    | VUS        | Joubert syndrome 7 (OMIM #611560), and Meckle syndrome 5 (OMIM #611561) severe, early onset obesity with features including hyperphagia, increased linear growth, preserved reproductive function, and hyperinsulinemia.                                                                                     |
| 99  | 3  | VPS13B  | c.7669G>A | p.Asp2557Asn | AR      | Heterozygous | 585720     | 0.04        | Tolerated      | VUS        | Cohen syndrome (OMIM #216550)                                                                                                                                                                                                                                                                                |
| 101 | 7  | INPP5E  | c.1544C>A | p.Arg515Gln  | AR      | Heterozygous | 1063364    | 0.046       | Conflicting    | VUS        | autosomal recessive intellectual disability with truncal obesity, retinal dystrophy and micropenis (OMIM #610156)                                                                                                                                                                                            |
| 101 | 7  | PLXNA2  | c.2896G>A | p.Glu966Lys  | Unknown | Heterozygous | Not listed | 0.004       | Conflicting    | VUS        | autism spectrum disorder. Semaphorin 3 signaling and maybe associated with obesity.                                                                                                                                                                                                                          |
| 101 | 7  | SEMA3F  | c.1963C>A | p.Arg655Ser  | Unknown | Heterozygous | Not listed | 0.058       | Conflicting    | VUS        | obesity                                                                                                                                                                                                                                                                                                      |
| 102 | 7  | GNAS    | c.1091C>A | p.Ala364Asp  | AR      | Heterozygous | Not listed | Not present | Conflicting    | VUS        | autosomal dominant pseudohypoparathyroidism Ia, Ib, and Ic (OMIM #103580, #603233, and #612462), associated with short stature, obesity, skeletal abnormalities, and other features, without hormone resistance.                                                                                             |
| 104 | 12 | BDNF    | c.*9T>Cq  | Post-coding  | AR      | Heterozygous | Not listed | 0.0029      | Not applicable | VUS        | autosomal dominant obesity with neurodevelopmental differences, while even larger deletions implicate BDNF as the cause of obesity in WAGRO syndrome. Minimal evidence implicates missense and other single nucleotide variants in BDNF as cause of autosomal dominant obesity.                              |
| 108 | 9  | CREBBP  | c.2323A>G | p.Met775Val  | AR      | Heterozygous | 1305241    | Not present | Damaging       | VUS        | autosomal dominant Rubinstein-Taybi syndrome 1 (OMIM #180849). An allelic disorder, Menke-Hennekam syndrome 1 has been associated with variants in exons 30 or 31 of CREBBP (OMIM #618332).                                                                                                                  |
| 109 | 8  | BBS1    | c.1169T>G | p.Met390Arg  | AR      | Heterozygous | 12143      | 0.28        | Conflicting    | Pathogenic | Bardet-Biedl syndrome 1 (OMIM #209900)                                                                                                                                                                                                                                                                       |
| 109 | 8  | ADCY3   | c.923A>G  | p.Asn308Ser  | AR      | Heterozygous | Not listed | Not present | Conflicting    | VUS        | autosomal recessive severe obesity                                                                                                                                                                                                                                                                           |
| 109 | 8  | BBS1    | c.1645G>T | p.Glu549*    | AR      | Heterozygous | 12144      | 0.0087      | Not applicable | Pathogenic | Bardet-Biedl syndrome 1 (OMIM #209900)                                                                                                                                                                                                                                                                       |
| 113 | 5  | ADCY3   | c.2042C>A | p.Ala681Asp  | AR      | Heterozygous | Not listed | 0.0087      | Conflicting    | VUS        | autosomal recessive severe obesity                                                                                                                                                                                                                                                                           |
| 113 | 5  | BBS9    | c.396G>C  | p.Gln132His  | AR      | Heterozygous | 841915     | 0.042       | Damaging       | VUS        | Bardet-Biedl syndrome 9 (OMIM #615986)                                                                                                                                                                                                                                                                       |
| 113 | 5  | ISL1    | c.755A>G  | p.Asn252Ser  | Unknown | Heterozygous | Not listed | 0.22        | Conflicting    | VUS        | Dilated cardiomyopathy, or congenital heart defects, and with obesity                                                                                                                                                                                                                                        |
| 113 | 5  | SEMA3F  | c.1963C>A | p.Arg655Ser  | Unknown | Heterozygous | Not listed | 0.058       | Conflicting    | VUS        | obesity                                                                                                                                                                                                                                                                                                      |
| 113 | 5  | TUB     | c.1421C>T | p.Thr474Met  | AR      | Heterozygous | 1485765    | 0.0098      | Conflicting    | VUS        | autosomal recessive retinal dystrophy and obesity (OMIM #616188)                                                                                                                                                                                                                                             |
| 114 | 5  | PCSK1   | c.1918A>G | p.Thr640Ala  | AR      | Heterozygous | 436278     | 0.45        | Tolerated      | VUS        | autosomal recessive obesity with impaired prohormone processing (OMIM #600955). Some heterozygous variants may impart a susceptibility to obesity (OMIM #612362)                                                                                                                                             |
| 116 | 10 | CFAP418 | c.518A>C  | p.Lys173Thr  | AR      | Heterozygous | 1015526    | Not present | Damaging       | VUS        | autosomal recessive Bardet-Biedl syndrome 21 (OMIM #617406), autosomal cone-rod dystrophy 16 (OMIM #614500), and autosomal recessive retinitis pigmentosa 64 (OMIM #614500).                                                                                                                                 |
| 117 | 8  | UCP3    | c.58G>A   | p.Ala20Thr   | AR      | Heterozygous | Not listed | 0.029       | Conflicting    | VUS        | severe obesity                                                                                                                                                                                                                                                                                               |
| 118 | 6  | GNAS    | c.1337C>T | p.Ala446Val  | AR      | Heterozygous | Not listed | 0.02        | Conflicting    | VUS        | Maternally-inherited pathogenic variants in GNAS are associated with autosomal dominant pseudohypoparathyroidism Ia, Ib, and Ic (OMIM #103580, #603233, and #612462). Paternally-inherited pathogenic variants in GNAS are associated with autosomal dominant pseudopsuedohypoparathyroidism (OMIM #612463). |

|     |    |           |            |                 |         |              |            |             |                |     |                                                                                                                                                                                                                                    |
|-----|----|-----------|------------|-----------------|---------|--------------|------------|-------------|----------------|-----|------------------------------------------------------------------------------------------------------------------------------------------------------------------------------------------------------------------------------------|
| 118 | 6  | LEPR      | c.82A>G    | p.Ile28Val      | AR      | Heterozygous | Not listed | 0.024       | Conflicting    | VUS | autosomal recessive obesity and hypogonadotropic hypogonadism due to leptor receptor deficiency                                                                                                                                    |
| 118 | 6  | PLXNA1    | c.2587G>C  | p.Asp863His     | Unknown | Heterozygous | Not listed | 0.016       | Conflicting    | VUS | developmental delay, and autism spectrum disorder phenotypes. Rare variants have been shown to affect Semaphorin 3 signaling and maybe associated with obesity.                                                                    |
| 120 | 3  | CEP290    | c.6893A>G  | p.Gln2298Arg    | AR      |              | 1039651    | Not present | Tolerated      | VUS | autosomal recessive Leber congenital amaurosis 10 (OMIM #611755).                                                                                                                                                                  |
| 120 | 3  | MKS1      | c.857A>G   | p.Asp286Gly     | AD      | Homozygous   | 445724     | 0.099       | Conflicting    | VUS | autosomal recessive Bardet-Biedl syndrome 13 (OMIM #615990), autosomal recessive Meckel-Gruber syndrome 1 (OMIM #249000).                                                                                                          |
| 120 | 3  | MKS1      | c.83T>C    | p.Val28Ala      | AD      | Homozygous   | 594505     | 0.007       | Conflicting    | VUS | autosomal recessive Bardet-Biedl syndrome 13 (OMIM #615990), autosomal recessive Meckel-Gruber syndrome 1 (OMIM #249000).                                                                                                          |
| 120 | 3  | SDCCAG8   | c.947T>C   | p.Met316Thr     | AR      | Heterozygous | 847765     | 0.076       | Conflicting    | VUS | autosomal recessive Bardet-Biedl syndrome 16 (OMIM #615993), and Senior-Loken syndrome 7 (OMIM #613615).                                                                                                                           |
| 120 | 3  | VPS13B    | c.11668G>A | p.Asp3890Asn    | AR      | Heterozygous | 1060017    | 0.0062      | Conflicting    | VUS | Cohen syndrome (OMIM #216550)                                                                                                                                                                                                      |
| 121 | 12 | BBS9      | c.396G>C   | p.Gln132His     | AR      | Heterozygous | 841915     | 0.042       | Damaging       | VUS | Autosomal recessive Bardet-Biedl syndrome 9 (OMIM #615986)                                                                                                                                                                         |
| 121 | 12 | SDCCAG8   | c.833G>A   | p.Arg278His     | AR      | Heterozygous | 850817     | 0.02        | Tolerated      | VUS | autosomal recessive Bardet-Biedl syndrome 16 (OMIM #615993), and Senior-Loken syndrome 7 (OMIM #613615).                                                                                                                           |
| 122 | 5  | INPP5E    | c.892A>T   | p.Asn298Tyr     | AR      | Heterozygous | 848442     | Not present | Conflicting    | VUS | autosomal recessive intellectual disability with truncal obesity, retinal dystrophy and micropenis (OMIM #610156)                                                                                                                  |
| 122 | 5  | SEMA3G    | c.640dup   | p.Ser214Phefs*4 | AR      | Heterozygous | Not listed | 0.0085      | Not applicable | VUS | severe, early onset obesity                                                                                                                                                                                                        |
| 123 | 14 | KIDINS220 | c.2210A>G  | p.Lys737Arg     | AR, AD  | Heterozygous | Not listed | Not present | Conflicting    | VUS | de novo in patients with spastic paraplegia, intellectual disability, nystagmus, and obesity                                                                                                                                       |
| 123 | 14 | SDCCAG8   | c.833G>A   | p.Arg278His     | AR      | Heterozygous | 850817     | 0.02        | Tolerated      | VUS | Bardet-Biedl syndrome 9                                                                                                                                                                                                            |
| 124 | 10 | IFT172    | c.4210G>A  | p.Gly140Ser     | AR      | Heterozygous | 864375     | 0.0085      | Conflicting    | VUS | spectrum of autosomal recessive ciliopathy-related disorders including, retinitis pigmentosa 71 OMIM #616394, short-rib thoracic dysplasia 10 with or without polydactyly OMIM #615630, and Bardet-Biedl syndrome 20 OMIM #619471. |
| 125 | 8  | CREBBP    | c.964G>A   | p.Val322Met     | AR      | Heterozygous | Not listed | 0.00088     | Conflicting    | VUS | autosomal dominant Rubinstein-Taybi syndrome 1 (OMIM #180849). An allelic disorder, Menke-Hennekam syndrome 1 has been associated with variants in exons 30 or 31 of CREBBP (OMIM #618332).                                        |
| 126 | 11 | ALMS1     | c.5438T>C  | p.Val1813Ala    | AR      | Heterozygous | 1363233    | Not present | Conflicting    | VUS | Alstrom syndrome (OMIM #203800)                                                                                                                                                                                                    |
| 126 | 11 | RPGRIPL   | c.251G>A   | p.Arg84Gln      | AR      | Heterozygous | 319668     | 0.062       | Conflicting    | VUS | autosomal recessive COACH syndrome 3 (OMIM #619113), Joubert syndrome 7 (OMIM #611560), and Meckle syndrome 5 (OMIM #611561)                                                                                                       |
| 126 | 11 | SH2B1     | c.269C>A   | p.Pro90His      | AR      | Heterozygous | 727734     | 0.46        | Conflicting    | VUS | obesity, insulin resistance and maladaptive behavior phenotypes                                                                                                                                                                    |
| 126 | 11 | TUB       | c.161C>A   | p.Thr54Lys      | AR      | Heterozygous | 1006177    | 0.0087      | Conflicting    | VUS | retinal dystrophy and obesity                                                                                                                                                                                                      |
| 127 | 8  | ALMS1     | c.7234A>G  | p.Ser2412Gly    | AR      | Heterozygous | 606844     | Not present | Conflicting    | VUS | Alstrom syndrome (OMIM #203800)                                                                                                                                                                                                    |
| 127 | 8  | NTRK2     | c.250G>A   | p.Glu84Lys      | AR      | Heterozygous | 600456     | Not present | Conflicting    | VUS | autosomal dominant obesity, hyperphagia, and developmental delay (OMIM #613886).                                                                                                                                                   |
| 127 | 8  | SH2B1     | c.1931C>T  | p.Pro644Leu     | AR      | Heterozygous | 608937     | 0.008       | Conflicting    | VUS | obesity, insulin resistance and maladaptive behavior phenotypes                                                                                                                                                                    |
| 128 | 17 | VPS13B    | c.8318T>C  | p.Val2773Ala    | AR      | Heterozygous | Not listed | Not present | Conflicting    | VUS | autosomal recessive Cohen syndrome (OMIM #216550)                                                                                                                                                                                  |
| 129 | 5  | KSR2      | c.731C>T   | p.Pro244Leu     | AR      | Heterozygous | Not listed | Not present | Conflicting    | VUS | autosomal recessive Cohen syndrome (OMIM #216550)                                                                                                                                                                                  |
| 129 | 5  | MKKS      | c.67A>G    | p.Arg23Gly      | AR      | Heterozygous | 497476     | 0.11        | Conflicting    | VUS | autosomal recessive Bardet-Biedl syndrome 6 (OMIM #605231)                                                                                                                                                                         |

|     |    |        |             |              |         |              |            |             |                |            |                                                                                                                                                                  |
|-----|----|--------|-------------|--------------|---------|--------------|------------|-------------|----------------|------------|------------------------------------------------------------------------------------------------------------------------------------------------------------------|
| 129 | 5  | MKS1   | c.857A>G    | p.Asp286Gly  | AR      | Heterozygous | 445724     | 0.099       | Conflicting    | VUS        | autosomal dominant non-syndromic obesity characterized by early-onset hyperphagia, low heart rate, reduced basal metabolic rate, and severe insulin resistance   |
| 129 | 5  | MKS1   | c.83T>C     | p.Val28Ala   | AR      | Heterozygous | 594505     | 0.007       | Conflicting    | VUS        | autosomal recessive Bardet-Biedl syndrome 13 (OMIM #615990), autosomal recessive Meckel-Gruber syndrome 1 (OMIM #249000).                                        |
| 129 | 5  | SH2B1  | c.1028C>T   | p.Thr343Met  | AR      | Heterozygous | Not listed | 0.048       | Conflicting    | VUS        | obesity, insulin resistance and maladaptive behavior phenotypes                                                                                                  |
| 131 | 6  | BBS1   | c.1645G>T   | p.Glu549*    | AR      | Heterozygous | 12144      | 0.0087      | Not applicable | Pathogenic | autosomal recessive Bardet-Biedl syndrome 1 (OMIM #209900)                                                                                                       |
| 132 | 9  | POMC   | c.26C>T     | p.Ser9Leu    | AR, AD  | Heterozygous | 983342     | 0.0054      | Tolerated      | VUS        | autosomal recessive obesity, adrenal insufficiency, and red hair due to POMC deficiency                                                                          |
| 132 | 9  | PCNT   | c.8947C>T   | p.Leu2983Phe | AR      | Heterozygous | 197082     | 0.071       | Conflicting    | VUS        | autosomal recessive microcephalic osteodysplastic primordial dwarfism, type II                                                                                   |
| 133 | 8  | EP300  | c.376A>G    | p.Met126Val  | AR      | Heterozygous | 134042     | 0.02        | Conflicting    | VUS        | Autosomal Dominant Rubinstein-Taybi syndrome 2, and Menke-Hennekam syndrome 2                                                                                    |
| 134 | 8  | BBS1   | c.1595G>T   | p.Arg532Leu  | AR      | Heterozygous | 862497     | 0.0029      | Conflicting    | VUS        | autosomal recessive Bardet-Biedl syndrome 1 (OMIM #209900)                                                                                                       |
| 134 | 8  | PLXNA3 | c.1297C>T   | p.Arg433Cys  | Unknown | Hemizygous   | Not listed | 0.01        | Conflicting    | VUS        | obesity, mild intellectual disability, and autism spectrum disorder                                                                                              |
| 134 | 8  | RAB23  | c.536A>C    | p.Glu179Ala  | AR      | Heterozygous | 357642     | 0.081       | Conflicting    | VUS        | autosomal recessive Carpenter syndrome (OMIM #201000)                                                                                                            |
| 134 | 8  | TUB    | c.1421C>T   | p.Thr474Met  | AR      | Heterozygous | 1485765    | 0.0098      | Conflicting    | VUS        | retinal dystrophy and obesity                                                                                                                                    |
| 136 | 6  | LEPR   | c.2681C>G   | p.Pro894Arg  | AR      | Heterozygous | Not listed | 0.08        | Conflicting    | VUS        | autosomal recessive obesity and hypogonadotropic hypogonadism due to leptor receptor deficiency                                                                  |
| 139 | 13 | ADCY3  | c.2042C>A   | p.Ala681Asp  | AR      | Heterozygous | 2405251    | 0.0087      | Conflicting    | VUS        | autosomal recessive severe obesity                                                                                                                               |
| 139 | 13 | PCSK1  | c.661A>G    | p.Asn221Asp  | AR      | Heterozygous | 14040      | 6.6         | Conflicting    | RISK       | autosomal recessive obesity with impaired prohormone processing (OMIM #600955). Some heterozygous variants may impart a susceptibility to obesity (OMIM #612362) |
| 139 | 13 | PLXNA2 | c.2494T>C   | p.Cys832Arg  | AR      | Heterozygous | Not listed | Not present | Damaging       | VUS        | autism spectrum disorder. Semaphorin 3 signaling and maybe associated with obesity.                                                                              |
| 140 | 15 | CEP290 | c.1623+2C>A | Splicing     | AR      | Heterozygous | 1432036    | Not present | Not applicable | Pathogenic | autosomal recessive Leber congenital amaurosis 10 (OMIM #611755).                                                                                                |
| 140 | 15 | SEMA3F | c.981G>A    | p.Pro327=    | AR      | Heterozygous | Not listed | 0.032       | Not applicable | VUS        | Obesity                                                                                                                                                          |

VUS: Variant of Uncertain Significance, AR: Autosomal Recessive, AD: Autosomal Dominant, IDN: Identification number.

**Table S1:** Variant Analysis from Pediatric Puerto Rican Obesity Cohort.
